# Supplementary material for: Straightforward synthesis of diverse dipyrazolylmethane derivatives and their application for fluorescence sensing of Cu2+ ions
Source: Royal Society of Chemistry journal article supplement (doi:10.1039/c6ra10530k), 2016-01-01

## Supporting Information

# **Straightforward synthesis of diverse dipyrazolylmethane derivatives and their application for fluorescence sensing of Cu<sup>2+</sup> ions**

Kaliappan Kaliraj, Likai Xia, Thomas Nesakumar Jebakumar Immanuel Edison, and Yong Rok Lee\*  
*School of Chemical Engineering, Yeungnam University, Gyeongsan 712-749, Republic of Korea*

\*Corresponding author. Tel: +82-53-810-2529; Fax: +82-53-810-4631

E-mail address: [yrlee@yu.ac.kr](mailto:yrlee@yu.ac.kr)

## **Contents**

|                                                                       |     |
|-----------------------------------------------------------------------|-----|
| I . General Information .....                                         | S1  |
| II . General Procedure for the synthesis of dipyrazolylmethanes. .... | S2  |
| III. Spectroscopic Data for dipyrazolylmethanes.....                  | S2  |
| IV. Fluorescence Measurements.....                                    | S8  |
| V. References. ....                                                   | S9  |
| VI. NMR Spectra .....                                                 | S10 |

## I. General Information

All experiments were carried out in a nitrogen atmosphere. Merck, pre-coated silica gel plates (Art. 5554) with a fluorescent indicator were used for analytical thin layer chromatography (TLC). Flash column chromatography was performed using silica gel 9385 (Merck).  $^1\text{H}$  nuclear magnetic resonance (NMR) spectra were recorded on Varian 300 MHz or 600 MHz spectrometers and the chemical shifts were reported in parts per million ( $\delta$ ) relative to tetramethylsilane (TMS) (0 ppm) as the internal standard or relative to the resonance of the residual protonated solvent ( $^1\text{H}$ :  $\text{CDCl}_3$ ,  $\delta = 7.24$  ppm; DMSO,  $\delta = 2.50$  ppm). The following abbreviations were used to describe the peak patterns where appropriate: singlet (s), doublet (d), triplet (t), quartet (q), and multiplet (m). The coupling constants,  $J$ , are reported in Hertz (Hz). The  $^{13}\text{C}$  NMR spectra were obtained using 75 MHz or 150 MHz spectrometers and referenced to the internal solvent signals ( $^{13}\text{C}$ :  $\text{CDCl}_3$ ,  $\delta = 77.0$  ppm; DMSO,  $\delta = 39.51$  ppm). All melting points were obtained on a Fisher-Johns melting point apparatus and were uncorrected. The Fourier transform infrared (FT-IR) spectra were recorded on a Jasco FTIR 5300 spectrophotometer. The high-resolution mass spectra (HRMS) were measured using a JEOL JMS-600 mass spectrometer (positive ion EI mode) at the Korean Basic Science Institute.

## II. General Procedures for the preparation of Dipyrazolymethanes (4a-4p)

*p*-Toluenesulfonic acid monohydrate (*p*-TsOH • H<sub>2</sub>O, 1 equiv.) was added to a solution of β-keto esters (1.0 mmol) and phenyl hydrazine hydrochlorides (1.0 mmol) in dry DMF (5.0 ml). The reaction mixture was stirred at 140 °C for the requested time. After the reaction was complete, as indicated by TLC, the mixture was allowed to cool to room temperature, quenched with water, and extracted with ethyl acetate. The organic layer was then dried over anhydrous MgSO<sub>4</sub> and the solvent was removed *in vacuo*. The residue was finally purified by column chromatography on silica gel using hexane-ethyl acetate mixture as the eluent to give the corresponding products **4a-4p**.

## III. Spectroscopic Data for dipyrazolymethanes

(*Z*)-4-((5-Hydroxy-3-methyl-1-phenyl-1*H*-pyrazol-4-yl)methylene)-5-methyl-2-phenyl-2,4-dihydro-3*H*-pyrazol-3-one (**4a**)<sup>s1</sup>

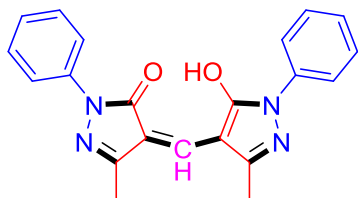

Yellow solid (134 mg, 75%): mp 127-129 °C; <sup>1</sup>H NMR (600 MHz, CDCl<sub>3</sub>) δ 17.93 (s, 1H), 7.91 (d, *J* = 7.8 Hz, 4H), 7.44 (dd, *J* = 8.4, 7.8 Hz, 4H), 7.29-7.26 (m, 2H), 7.25 (s, 1H), 2.37 (s, 6H); <sup>13</sup>C NMR (75 MHz, CDCl<sub>3</sub>) δ 161.1, 152.6, 138.0, 137.6, 128.8, 126.3, 120.8, 109.4, 12.7; IR (KBr): 3471, 2924, 1623, 1382, 1103, 896, 754, 667 cm<sup>-1</sup>; HRMS *m/z* (M<sup>+</sup>) calcd for C<sub>21</sub>H<sub>18</sub>N<sub>4</sub>O<sub>2</sub>: 358.1430. Found: 358.1430.

(*Z*)-2-(2-Ethylphenyl)-4-((1-(2-ethylphenyl)-5-hydroxy-3-methyl-1*H*-pyrazol-4-yl)methylene)-5-methyl-2,4-dihydro-3*H*-pyrazol-3-one (**4b**)

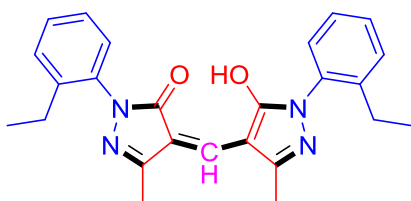

Yellow solid (141 mg, 68%): mp 174-176 °C; <sup>1</sup>H NMR (300 MHz, CDCl<sub>3</sub>) δ 7.34-7.32 (m, 5H), 7.26-7.24 (m, 4H), 2.59 (q, *J* = 7.5 Hz, 4H), 2.35 (s, 6H), 1.14 (t, *J* = 7.5 Hz, 6H); <sup>13</sup>C NMR (75 MHz, CDCl<sub>3</sub>) δ 161.9, 152.2, 141.2, 138.7, 135.0, 129.4, 129.1, 127.3, 126.4, 108.2, 24.3, 14.2, 12.8; IR (KBr): 3451, 2964, 1609, 1317, 1081, 763, 650 cm<sup>-1</sup>; HRMS *m/z* (M<sup>+</sup>) calcd for C<sub>25</sub>H<sub>26</sub>N<sub>4</sub>O<sub>2</sub>: 414.2056. Found: 414. 414.2057.

(*Z*)-4-((5-Hydroxy-3-methyl-1-(*p*-tolyl)-1*H*-pyrazol-4-yl)methylene)-5-methyl-2-(*p*-tolyl)-2,4-dihydro-3*H*-pyrazol-3-one (**4c**)

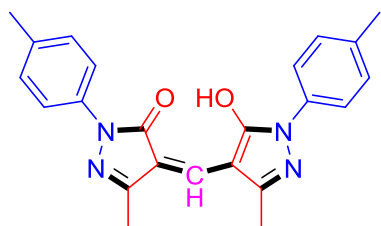

Yellow solid (141 mg, 73%): mp 229-231 °C;  $^1\text{H}$  NMR (300 MHz,  $\text{CDCl}_3$ )  $\delta$  7.69 (d,  $J = 8.1$  Hz, 4H), 7.18-7.14 (m, 5H), 2.30 (s, 6H), 2.27 (s, 6H);  $^{13}\text{C}$  NMR (75 MHz,  $\text{CDCl}_3$ )  $\delta$  161.0, 152.5, 138.1, 136.3, 135.2, 129.4, 121.0, 109.4, 21.0, 12.9; IR (KBr): 3484, 2370, 1623, 1494, 1380, 1327, 1110, 1003, 889, 753, 663  $\text{cm}^{-1}$ ; HRMS  $m/z$  ( $\text{M}^+$ ) calcd for  $\text{C}_{23}\text{H}_{22}\text{N}_4\text{O}_2$ : 386.1743. Found: 386.1745.

**(Z)-4-((5-Hydroxy-1-(4-isopropylphenyl)-3-methyl-1H-pyrazol-4-yl)methylene)-2-(4-isopropylphenyl)-5-methyl-2,4-dihydro-3H-pyrazol-3-one (4d)**

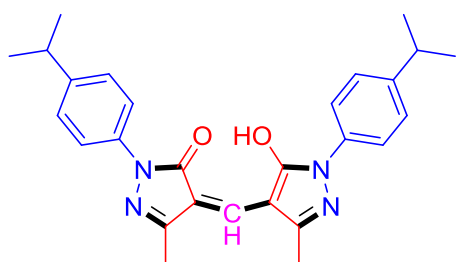

Yellow solid (153 mg, 69%): mp 236-238 °C;  $^1\text{H}$  NMR (300 MHz,  $\text{CDCl}_3$ )  $\delta$  7.83 (d,  $J = 8.1$  Hz, 4H), 7.32 (d,  $J = 8.4$  Hz, 4H), 7.24 (s, 1H), 3.02-2.91 (m, 2H), 2.36 (s, 6H), 1.30 (d,  $J = 6.6$  Hz, 12H);  $^{13}\text{C}$  NMR (75 MHz,  $\text{CDCl}_3$ )  $\delta$  161.0, 152.5, 147.3, 138.0, 135.4, 126.8, 121.1, 109.3, 33.7, 23.9, 12.7; IR (KBr): 3458, 2963, 1606, 1315, 1079, 822, 592  $\text{cm}^{-1}$ ; HRMS  $m/z$  ( $\text{M}^+$ ) calcd for  $\text{C}_{27}\text{H}_{30}\text{N}_4\text{O}_2$ : 442.2369. Found: 442.2371.

**(Z)-4-((5-Hydroxy-1-(4-methoxyphenyl)-3-methyl-1H-pyrazol-4-yl)methylene)-2-(4-methoxyphenyl)-5-methyl-2,4-dihydro-3H-pyrazol-3-one (4e)<sup>s2</sup>**

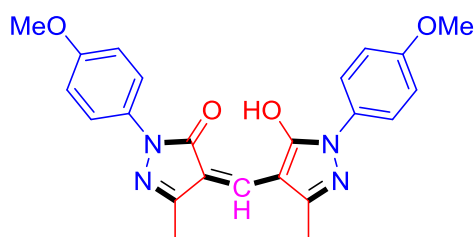

Yellow solid (151 mg, 72%): mp 211-213 °C;  $^1\text{H}$  NMR (300 MHz,  $\text{CDCl}_3$ )  $\delta$  7.79 (d,  $J = 8.7$  Hz, 4H), 7.28 (s, 1H), 6.97 (d,  $J = 9.0$  Hz, 4H), 3.85 (s, 6H), 2.37 (s, 6H);  $^{13}\text{C}$  NMR (75 MHz,  $\text{CDCl}_3$ )  $\delta$  160.7, 158.0, 152.5, 138.1, 130.9, 122.8, 114.0, 109.3, 55.5, 12.9; IR (KBr): 3477, 2941, 1616, 1511, 1323, 1167, 1009, 821, 596  $\text{cm}^{-1}$ ; HRMS  $m/z$  ( $\text{M}^+$ ) calcd for  $\text{C}_{23}\text{H}_{22}\text{N}_4\text{O}_4$ : 418.1641. Found: 418.1642.

**(Z)-2-(2,3-Dimethylphenyl)-4-((1-(2,3-dimethylphenyl)-5-hydroxy-3-methyl-1H-pyrazol-4-yl)methylene)-5-methyl-2,4-dihydro-3H-pyrazol-3-one (4f)<sup>s3</sup>**

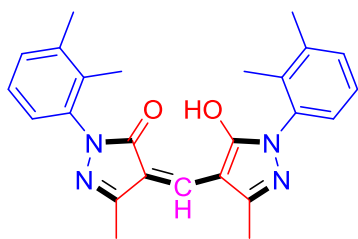

Orange solid (145 mg, 70%): mp 236-238 °C;  $^1\text{H}$  NMR (300 MHz,  $\text{CDCl}_3$ )  $\delta$  7.26 (s, 1H), 7.13-7.06 (m, 6H), 2.28 (s, 6H), 2.22 (s, 6H), 2.02 (s, 6H);  $^{13}\text{C}$  NMR (75 MHz,  $\text{CDCl}_3$ )  $\delta$  157.1, 147.7, 134.1, 133.5, 131.0, 129.3, 125.9, 121.3, 120.0, 103.6, 15.6, 9.9, 8.2; IR (KBr): 3467, 2929, 1608, 1318, 998, 775, 604  $\text{cm}^{-1}$ ; HRMS  $m/z$  ( $\text{M}^+$ ) calcd for  $\text{C}_{25}\text{H}_{26}\text{N}_4\text{O}_2$ : 414.2056. Found: 414.2052.

**(Z)-2-(2,4-Dimethylphenyl)-4-((1-(2,4-dimethylphenyl)-5-hydroxy-3-methyl-1H-pyrazol-4-yl)methylene)-5-methyl-2,4-dihydro-3H-pyrazol-3-one (4g)**

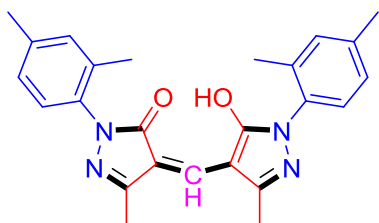

Yellow solid (155 mg, 75%): mp 156-158 °C;  $^1\text{H}$  NMR (600 MHz,  $\text{CDCl}_3$ )  $\delta$  7.59 (s, 1H), 7.31 (s, 1H), 7.16 (d,  $J$  = 7.8 Hz, 2H), 7.08 (s, 2H), 7.05 (d,  $J$  = 8.4 Hz, 2H), 2.35 (s, 6H), 2.32 (s, 6H), 2.18 (s, 6H);  $^{13}\text{C}$  NMR (75 MHz,  $\text{CDCl}_3$ )  $\delta$  161.7, 152.3, 139.0, 138.6, 134.9, 133.1, 131.5, 127.2, 126.7, 108.3, 21.1, 17.9, 12.9; IR (KBr): 3490, 2957, 1613, 1320, 1081, 812  $\text{cm}^{-1}$ ; HRMS  $m/z$  ( $\text{M}^+$ ) calcd for  $\text{C}_{25}\text{H}_{26}\text{N}_4\text{O}_2$ : 414.2056. Found: 414.2052.

**(Z)-2-(2,5-Dimethylphenyl)-4-((1-(2,5-dimethylphenyl)-5-hydroxy-3-methyl-1H-pyrazol-4-yl)methylene)-5-methyl-2,4-dihydro-3H-pyrazol-3-one (4h)**

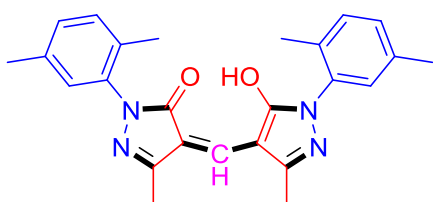

Yellow solid (162 mg, 78%): mp 212-214 °C;  $^1\text{H}$  NMR (300 MHz,  $\text{CDCl}_3$ )  $\delta$  7.25 (s, 1H), 7.10-7.02 (m, 6H), 2.29 (s, 6H), 2.24 (s, 6H), 2.12 (s, 6H);  $^{13}\text{C}$  NMR (75 MHz,  $\text{CDCl}_3$ )  $\delta$  161.7, 152.5, 138.8, 136.4, 135.5, 132.1, 130.8, 130.0, 127.4, 108.4, 20.7, 17.6, 13.0; IR (KBr): 3460, 2955, 1610, 1531, 1446, 1321, 1137, 1002, 805, 668  $\text{cm}^{-1}$ ; HRMS  $m/z$  ( $\text{M}^+$ ) calcd for  $\text{C}_{25}\text{H}_{26}\text{N}_4\text{O}_2$ : 414.2056. Found: 414.2057.

**(Z)-2-(2-Chlorophenyl)-4-((1-(2-chlorophenyl)-5-hydroxy-3-methyl-1H-pyrazol-4-yl)methylene)-5-methyl-2,4-dihydro-3H-pyrazol-3-one (4i)**

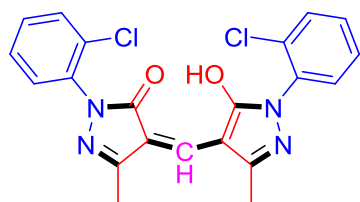

Yellow solid (160 mg, 75%): mp 208-210 °C;  $^1\text{H}$  NMR (300 MHz,  $\text{CDCl}_3$ )  $\delta$  7.51-7.48 (m, 2H), 7.43-7.40 (m, 2H), 7.36-7.34 (m, 5H), 2.37 (s, 6H);  $^{13}\text{C}$  NMR (75 MHz,  $\text{CDCl}_3$ )  $\delta$  162.2, 152.8, 139.0, 134.4, 131.9, 130.4, 129.1, 127.4, 108.3, 13.0; IR (KBr): 3452, 2925, 1626, 1384, 1326, 1100, 1002, 818, 726  $\text{cm}^{-1}$ ; HRMS  $m/z$  ( $\text{M}^+$ ) calcd for  $\text{C}_{21}\text{H}_{16}\text{Cl}_2\text{N}_4\text{O}_2$ : 426.0650. Found: 426.0652.

**(Z)-4-((5-Hydroxy-3-methyl-1-(4-nitrophenyl)-1H-pyrazol-4-yl)methylene)-5-methyl-2-(4-nitrophenyl)-2,4-dihydro-3H-pyrazol-3-one (4j)<sup>s4</sup>**

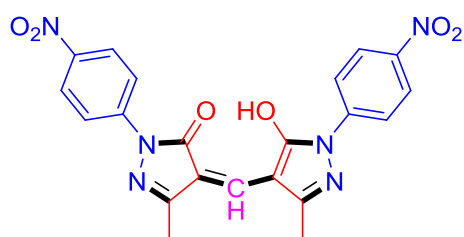

Yellow solid (134 mg, 60%): mp >300 °C;  $^1\text{H}$  NMR (600 MHz,  $\text{DMSO-d}_6$ )  $\delta$  13.23 (s, 1H), 8.26 (d,  $J = 9.6$  Hz, 2H), 8.23 (d,  $J = 9.0$  Hz, 2H), 8.18 (d,  $J = 9.0$  Hz, 2H), 7.94 (s, 1H), 7.78 (d,  $J = 9.0$  Hz, 2H), 2.12 (s, 6H); IR (KBr): 3424, 2927, 2256, 1616, 1511, 1323, 1167, 1009, 821, 596  $\text{cm}^{-1}$ .

**(Z)-2-(2,4-Dichlorophenyl)-4-((1-(2,4-dichlorophenyl)-5-hydroxy-3-methyl-1H-pyrazol-4-yl)methylene)-5-methyl-2,4-dihydro-3H-pyrazol-3-one (4k)**

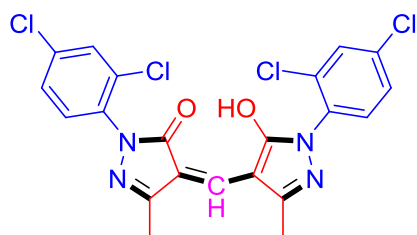

Yellow solid (180 mg, 73%): mp 196-198 °C;  $^1\text{H}$  NMR (300 MHz,  $\text{CDCl}_3$ )  $\delta$  7.51 (d,  $J = 1.5$  Hz, 2H), 7.37-7.31 (m, 5H), 2.35 (s, 6H);  $^{13}\text{C}$  NMR (75 MHz,  $\text{CDCl}_3$ )  $\delta$  162.3, 153.1, 139.1, 135.7, 133.1, 132.9, 130.3, 129.8, 127.8, 108.4, 12.9; IR (KBr): 3457, 1621, 1374, 1089, 825  $\text{cm}^{-1}$ ; HRMS  $m/z$  ( $\text{M}^+$ ) calcd for  $\text{C}_{21}\text{H}_{14}\text{Cl}_4\text{N}_4\text{O}_2$ : 493.9871. Found: 493.9869.

**(Z)-2-(2,5-Dichlorophenyl)-4-((1-(2,5-dichlorophenyl)-5-hydroxy-3-methyl-1H-pyrazol-4-yl)methylene)-5-methyl-2,4-dihydro-3H-pyrazol-3-one (4l)**

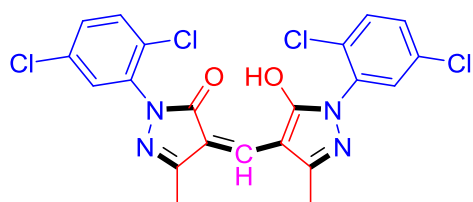

Yellow solid (173 mg, 70%): mp 182-184 °C;  $^1\text{H}$  NMR (300 MHz,  $\text{CDCl}_3$ +DMSO- $d_6$ )  $\delta$  7.37-7.26 (m, 3H), 7.15-7.06 (m, 4H), 2.25 (s, 6H);  $^{13}\text{C}$  NMR (75 MHz,  $\text{CDCl}_3$ +DMSO- $d_6$ )  $\delta$  161.7, 152.9, 138.7, 130.0, 129.9, 127.4, 124.1, 124.0, 116.4, 116.2, 108.0, 12.5; IR (KBr): 3426, 2256, 1632, 1416, 1005, 753, 644  $\text{cm}^{-1}$ ; HRMS  $m/z$  ( $\text{M}^+$ ) calcd for  $\text{C}_{21}\text{H}_{14}\text{Cl}_4\text{N}_4\text{O}_2$ : 493.9871. Found: 493.9868.

**(Z)-2-Benzyl-4-((1-benzyl-5-hydroxy-3-methyl-1H-pyrazol-4-yl)methylene)-5-methyl-2,4-dihydro-3H-pyrazol-3-one (4m)**

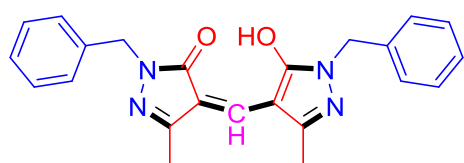

Yellow solid (149 mg, 77%): mp 154-156 °C;  $^1\text{H}$  NMR (300 MHz,  $\text{CDCl}_3$ )  $\delta$  7.43-7.36 (m, 10H), 7.35 (s, 1H), 5.11 (s, 4H), 2.33 (s, 6H);  $^{13}\text{C}$  NMR (75 MHz,  $\text{CDCl}_3$ )  $\delta$  161.3, 151.7, 138.2, 135.9, 128.5, 127.9, 127.6, 108.0, 49.2, 12.6; IR (KBr): 3456, 2935, 1617, 1528, 1445, 1323, 1113, 693  $\text{cm}^{-1}$ ; HRMS  $m/z$  ( $\text{M}^+$ ) calcd for  $\text{C}_{23}\text{H}_{22}\text{N}_4\text{O}_2$ : 386.1743. Found: 386.1743.

**(Z)-2-(2,5-Dimethylphenyl)-4-((1-(2,5-dimethylphenyl)-5-hydroxy-3-propyl-1H-pyrazol-4-yl)methylene)-5-propyl-2,4-dihydro-3H-pyrazol-3-one (4n)**

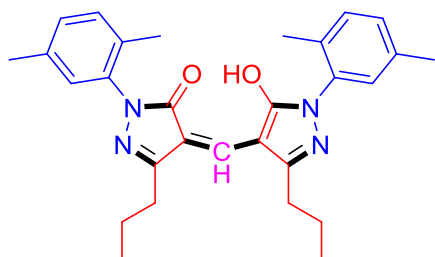

Yellow liquid (169 mg, 72%):  $^1\text{H}$  NMR (300 MHz,  $\text{CDCl}_3$ )  $\delta$  7.40 (s, 1H), 7.17-7.08 (m, 6H), 2.68 (t,  $J = 7.5$  Hz, 4H), 2.31 (s, 6H), 2.18 (s, 6H), 1.77 (q,  $J = 7.5$  Hz, 4H), 1.05 (t,  $J = 7.5$  Hz, 6H);  $^{13}\text{C}$  NMR (75 MHz,  $\text{CDCl}_3$ )  $\delta$  161.8, 155.9, 138.3, 136.4, 135.5, 132.1, 130.8, 130.0, 127.4, 107.6, 29.1, 22.0, 20.7, 17.6, 14.0; IR (neat): 3549, 2943, 1613, 1366, 1098, 819  $\text{cm}^{-1}$ ; HRMS  $m/z$  ( $\text{M}^+$ ) calcd for  $\text{C}_{29}\text{H}_{34}\text{N}_4\text{O}_2$ : 470.2682. Found: 470.2682.

**(Z)-5-(Difluoromethyl)-4-((3-(difluoromethyl)-1-(2,5-dimethylphenyl)-5-hydroxy-1H-pyrazol-4-yl)methylene)-2-(2,5-dimethylphenyl)-2,4-dihydro-3H-pyrazol-3-one (4o)**

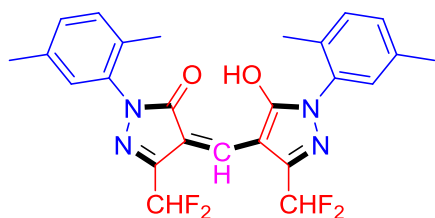

Yellow solid (177 mg, 73%): mp 168 °C;  $^1\text{H}$  NMR (300 MHz,  $\text{CDCl}_3$ )  $\delta$  8.29 (s, 1H), 7.21-7.14 (m, 4H), 7.10 (s, 2H), 6.59 (t,  $J_{\text{H-F}} = 53.1$  Hz, 2H), 2.33 (s, 6H), 2.17 (s, 6H);  $^{13}\text{C}$  NMR (75 MHz,  $\text{CDCl}_3$ )  $\delta$  162.3, 147.7 (t,  $J_{\text{C-F}} = 29.1$  Hz), 141.2, 136.7, 134.7, 132.1, 131.0, 130.7, 127.3, 115.3, 112.1, 109.0, 105.9, 20.7, 17.4; IR (KBr): 3597, 2932, 1623, 1524, 1383, 1042, 835, 739  $\text{cm}^{-1}$ ; HRMS  $m/z$  ( $\text{M}^+$ ) calcd for  $\text{C}_{25}\text{H}_{22}\text{F}_4\text{N}_4\text{O}_2$ : 486.1679. Found: 486.1681.

**(Z)-2-(2,3-Dimethylphenyl)-4-((1-(2,3-dimethylphenyl)-5-hydroxy-3-(trifluoromethyl)-1H-pyrazol-4-yl)methylene)-5-(trifluoromethyl)-2,4-dihydro-3H-pyrazol-3-one (4p)**

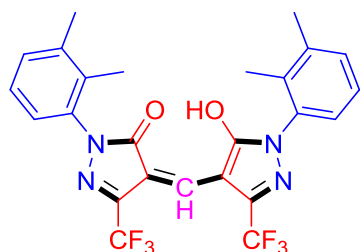

Yellow solid (191 mg, 73%): mp 191-193 °C;  $^1\text{H}$  NMR (300 MHz,  $\text{CDCl}_3+\text{DMSO-d}_6$ )  $\delta$  7.30-7.19 (m, 6H), 5.84 (s, 2H), 2.37 (s, 6H), 2.04 (s, 6H);  $^{13}\text{C}$  NMR (75 MHz,  $\text{CDCl}_3+\text{DMSO-d}_6$ )  $\delta$  153.4, 140.6 (q,  $J_{\text{C-F}} = 37.4$  Hz), 137.5, 135.7, 133.8, 130.1, 125.1, 124.7, 122.5, 119.0, 83.9, 19.4, 13.4; IR (KBr): 3411, 2255, 1654, 1492, 1245, 1002, 859, 710  $\text{cm}^{-1}$ ; HRMS  $m/z$  ( $\text{M}^+$ ) calcd for  $\text{C}_{25}\text{H}_{20}\text{F}_6\text{N}_4\text{O}_2$ : 522.1490. Found: 522.1488.



#### IV. Fluorescence measurements

Chloride salts of  $\text{Al}^{3+}$ ,  $\text{Ca}^{2+}$ ,  $\text{Co}^{2+}$ ,  $\text{Cr}^{3+}$ ,  $\text{Cu}^{2+}$ ,  $\text{Fe}^{3+}$ ,  $\text{Hg}^{2+}$ ,  $\text{Ni}^{2+}$ , lead nitrate ( $\text{Pb}^{2+}$ ), and cadmium acetate ( $\text{Cd}^{2+}$ ) were purchased from Sigma-Aldrich and used as received. For fluorescence analysis, dipyrzolylmethane derivatives **4a**, **4e**, **4j**, **4k**, and **4p** (1.50 mL,  $1.0 \times 10^{-4}$  M in MeCN) were transferred to cuvettes and the corresponding emission spectrum were measured at an excitation wavelength of 330 nm. The selectivity of compound **4j** was tested against ten different metal cations, such as  $\text{Al}^{3+}$ ,  $\text{Ca}^{2+}$ ,  $\text{Cd}^{2+}$ ,  $\text{Co}^{2+}$ ,  $\text{Cr}^{3+}$ ,  $\text{Cu}^{2+}$ ,  $\text{Fe}^{3+}$ ,  $\text{Hg}^{2+}$ ,  $\text{Ni}^{2+}$ , and  $\text{Pb}^{2+}$  ions (25  $\mu\text{M}$  in MeCN). Furthermore, the sensitivity of compound **4j** towards different concentrations of  $\text{Cu}^{2+}$  ions was examined. The fluorescence measurements were carried out using a Hitachi Fluorescence Spectrophotometer F-7000 with a 5 nm slit width and a scan speed at 240 nm/min.

The quenching efficiency of  $\text{Cu}^{2+}$  ions was calculated using the Stern-Volmer relation (1) and the limit of detection (LOD) of dipyrzolylmethane **4j** was computed using the formula (2).

$$F_0/F = 1 + K_{sv} [Q] \quad (1)$$

where  $F_0$  and  $F$  are the fluorescence intensities of dipyrzolylmethane **4j** in the absence and presence of  $\text{Cu}^{2+}$  ions, respectively,  $K_{sv}$  is the Stern–Volmer quenching constant and  $[Q]$  is the concentration of  $\text{Cu}^{2+}$  ions.

$$\text{LOD} = \frac{3S}{b} \quad (2)$$

where  $S$  is the standard deviation of  $F_0$  (5 results) and  $b$  is the slope of the linear line (Fig. S1).<sup>s5</sup>

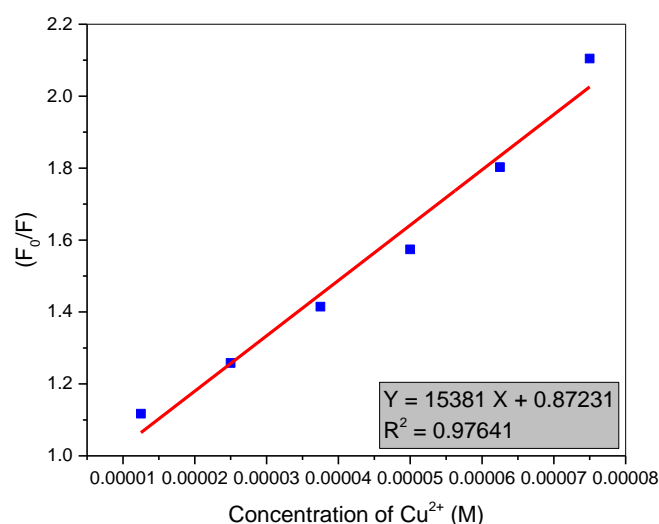

**Fig. S1** Stern–Volmer plot of fluorescence intensity ratios ( $F_0/F$ ) versus  $\text{Cu}^{2+}$  ions concentrations.

## V. References

- s1 F. F. Wong and Y.-Y. Huang, *Tetrahedron*, 2011, **67**, 3863-3867.
- s2 Y. Ma, J. Wang and H. Ma, *Heterocycles*, 2014, **89**, 1645-1655.
- s3 CCDC 1474418 for **4f** contains the supplementary crystallographic data for this paper. The data can be obtained free of charge from The Cambridge Crystallographic Data Centre via [www.ccdc.cam.ac.uk/data\\_request/cif](http://www.ccdc.cam.ac.uk/data_request/cif).
- s4 (a) Y. A. Azev, S. V. Shorshnev and D. Gabel, *Pharm. Chem. J.*, 2002, **36**, 146-150; (b) A. Kreutzberger and K. Kolter, *J. Heterocycl. Chem.*, 1986, **23**, 781-784; (c) W. Häensel, *Justus Liebigs Ann. Chem.*, 1976, 1680-1688.
- s5 T. N. J. I. Edison, R. Atchudan, J.-J. Shim, S. Kalimuthu, B.-C. Ahn, Y. R. Lee, *J. Photochem. Photobiol. B*, 2016, **158**, 235-242.

## VI. NMR Spectra

$^1\text{H}$  NMR of Compound **4a**

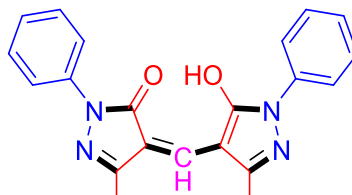

600 MHz,  $\text{CDCl}_3$

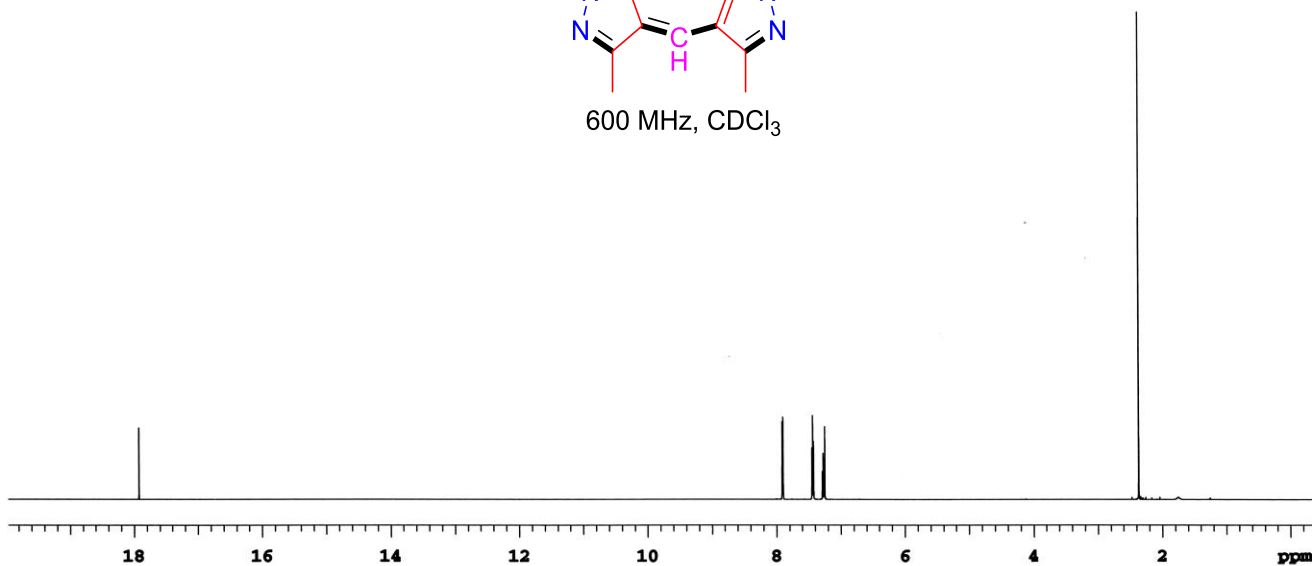

$^{13}\text{C}$  NMR of Compound **4a**

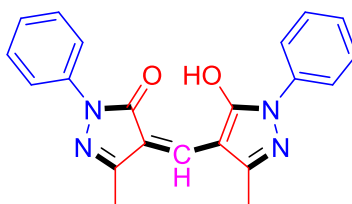

75 MHz,  $\text{CDCl}_3$

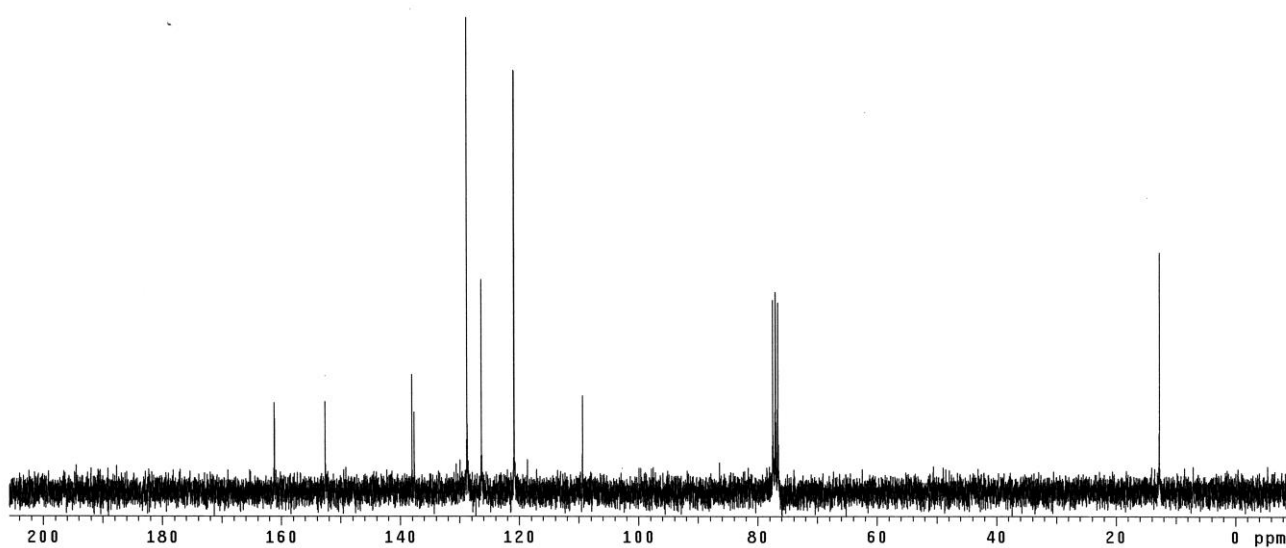

<sup>1</sup>H NMR of Compound **4b**

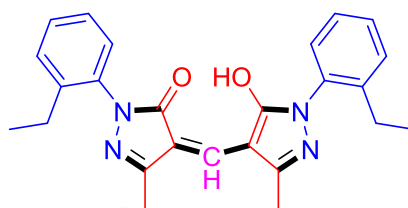

300 MHz, CDCl<sub>3</sub>

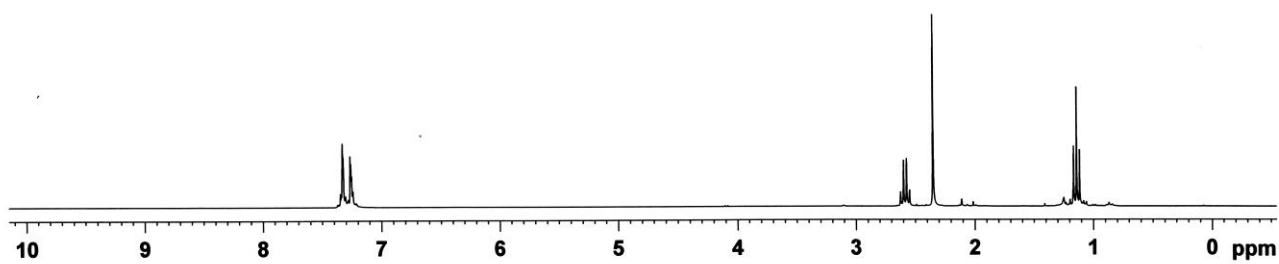

<sup>13</sup>C NMR of Compound **4b**

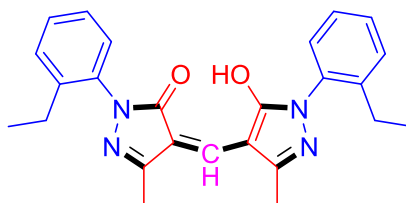

75 MHz, CDCl<sub>3</sub>

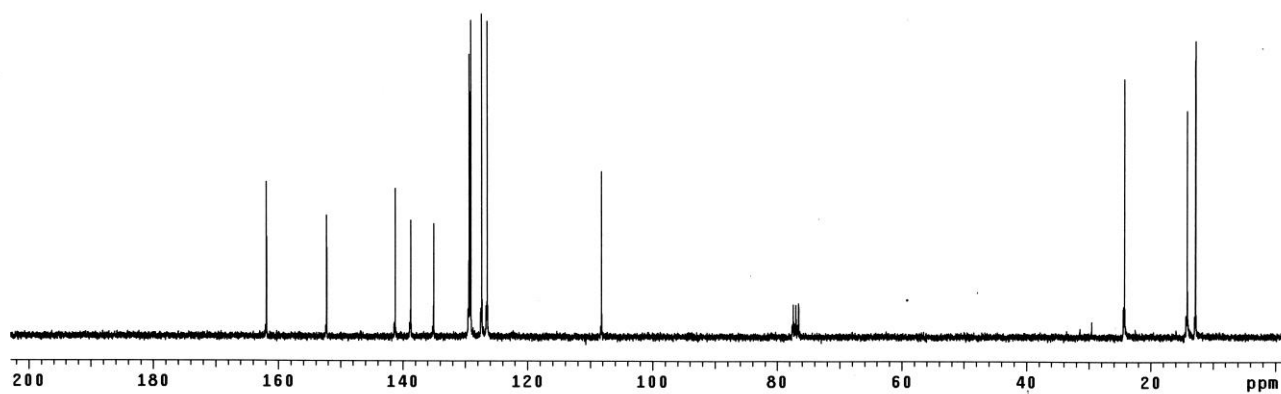

<sup>1</sup>H NMR of Compound **4c**

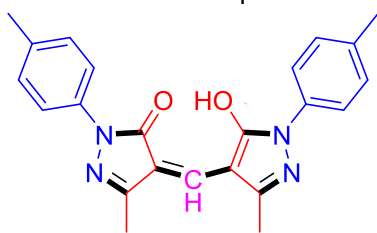

300 MHz, CDCl<sub>3</sub>

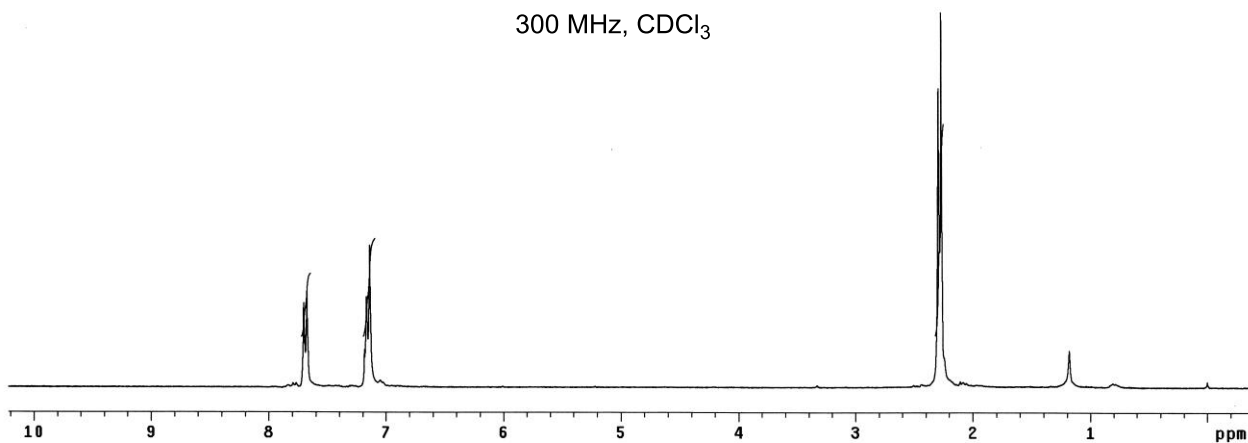

<sup>13</sup>C NMR of Compound **4c**

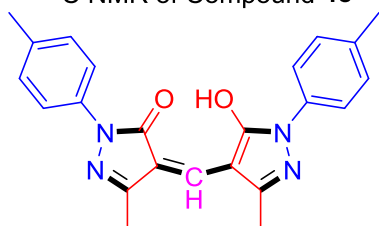

75 MHz, CDCl<sub>3</sub>

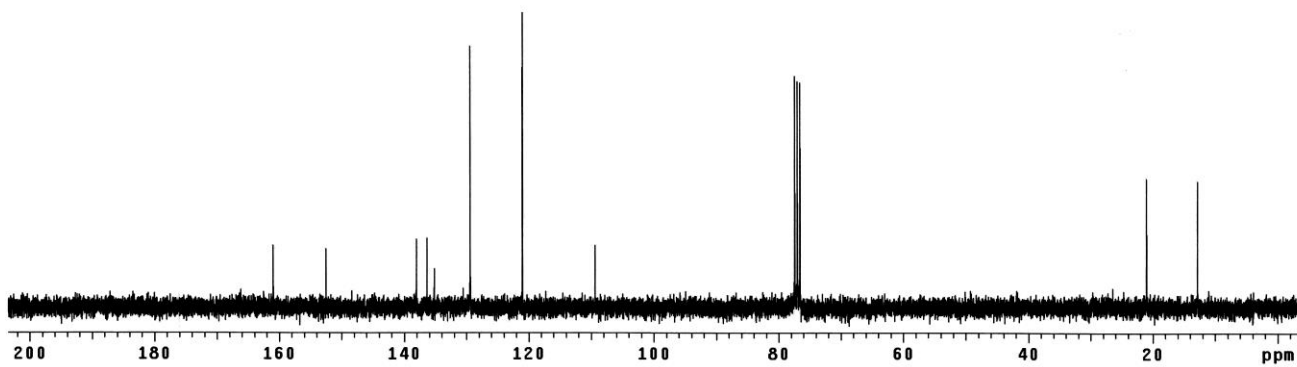

<sup>1</sup>H NMR of Compound 4d

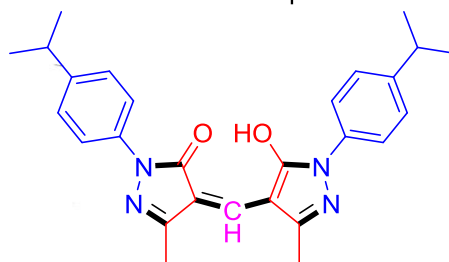

300 MHz, CDCl<sub>3</sub>

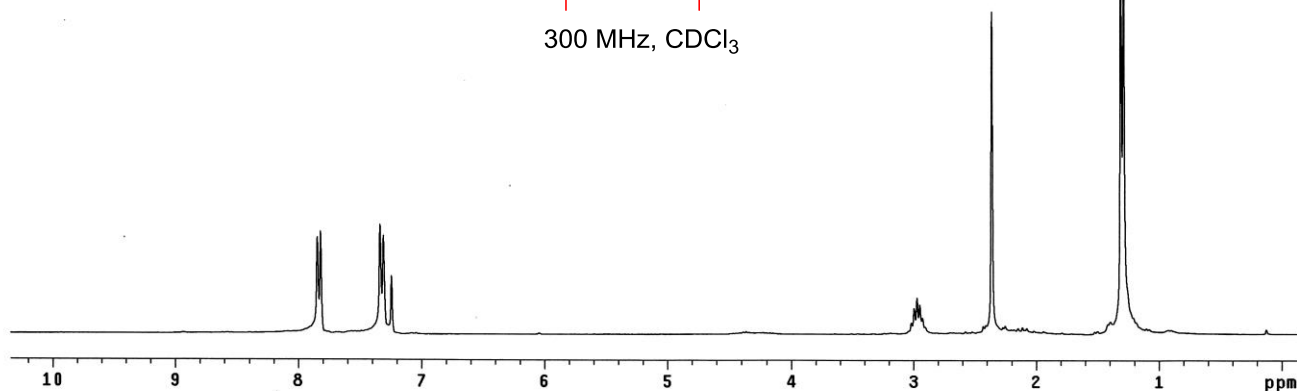

<sup>13</sup>C NMR of Compound 4d

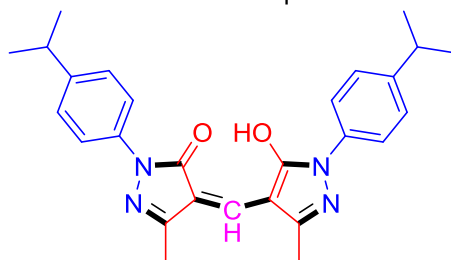

75 MHz, CDCl<sub>3</sub>

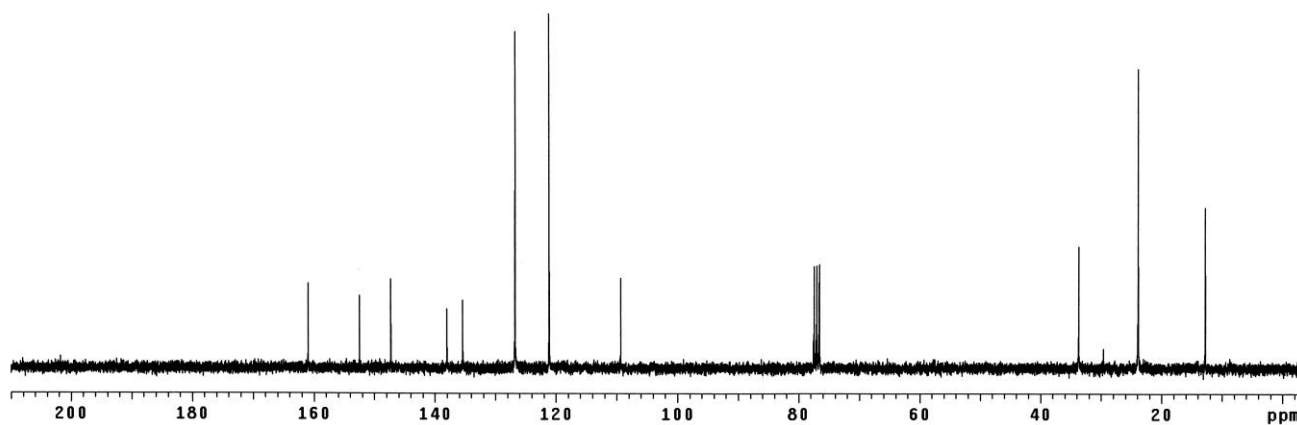

<sup>1</sup>H NMR of Compound 4e

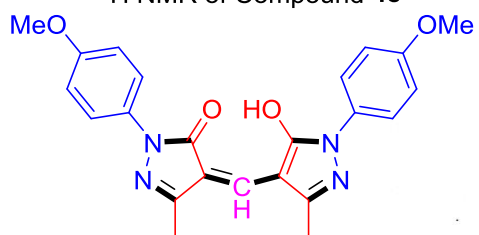

300 MHz, CDCl<sub>3</sub>

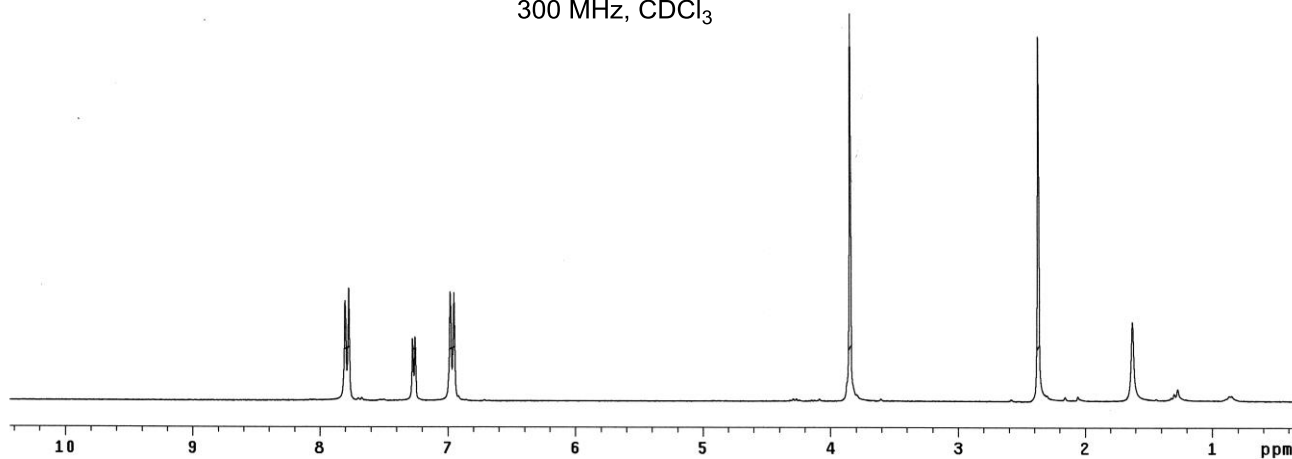

<sup>13</sup>C NMR of Compound 4e

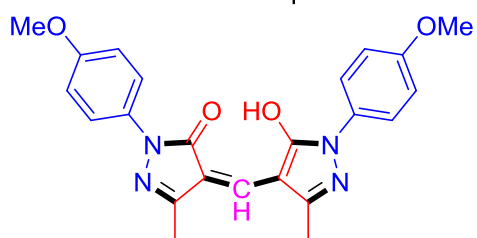

75 MHz, CDCl<sub>3</sub>

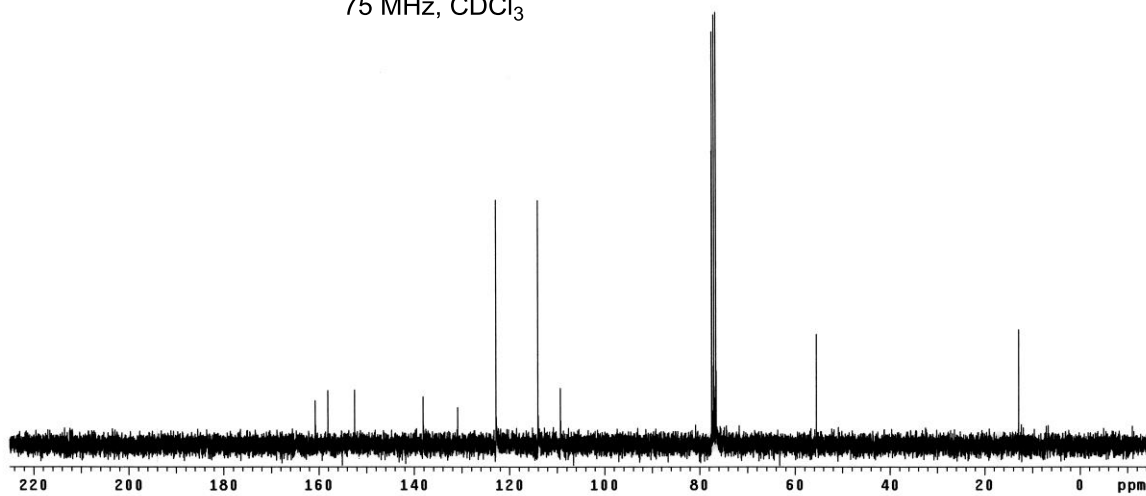

<sup>1</sup>H NMR of Compound **4f**

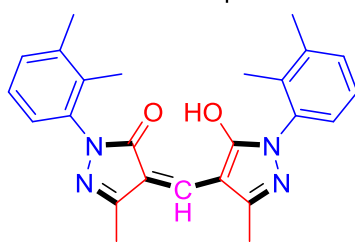

300 MHz, CDCl<sub>3</sub>

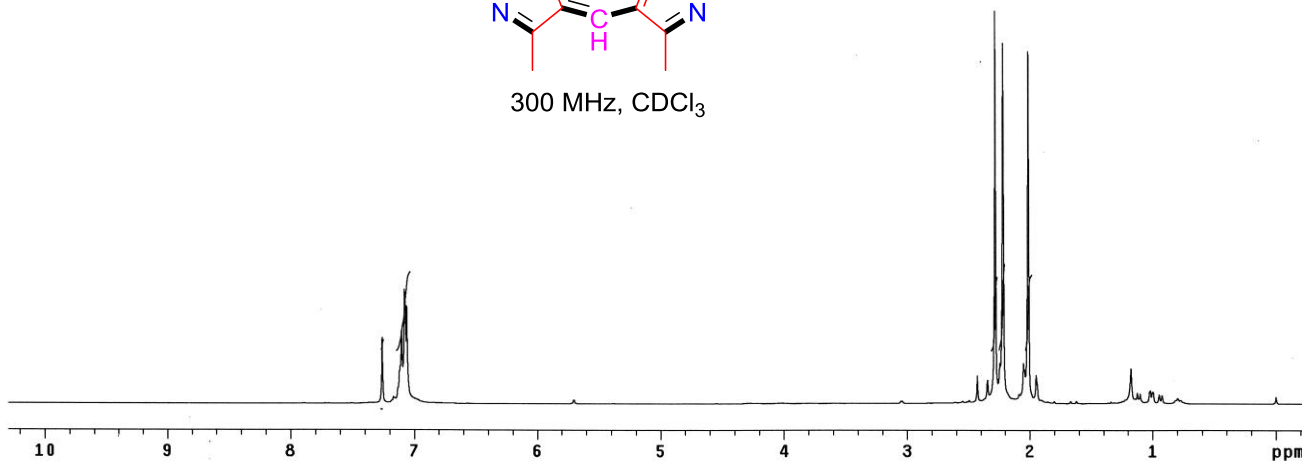

<sup>13</sup>C NMR of Compound **4f**

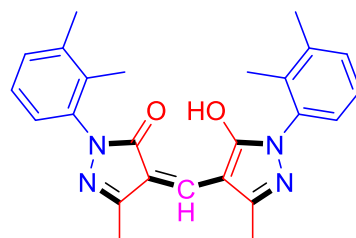

75 MHz, CDCl<sub>3</sub>

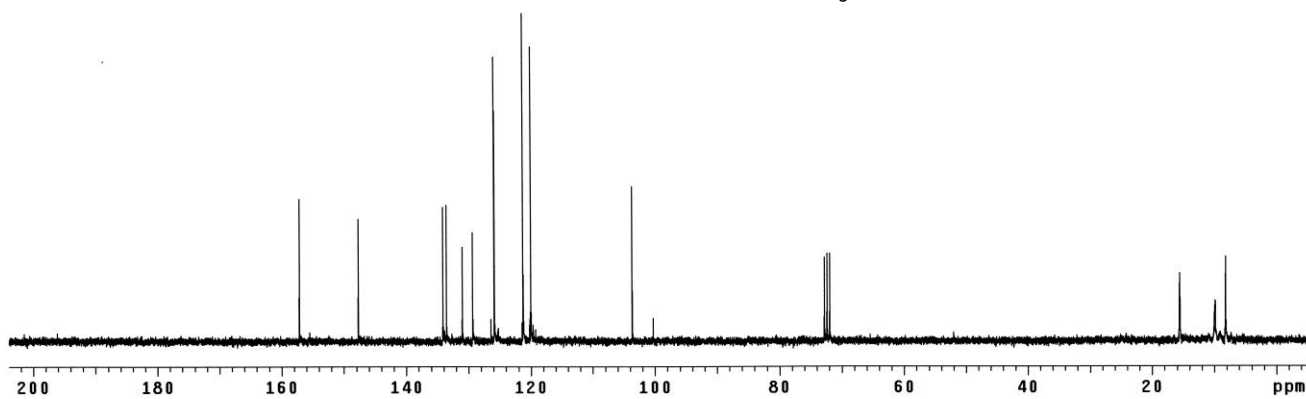



<sup>1</sup>H NMR of Compound **4g**

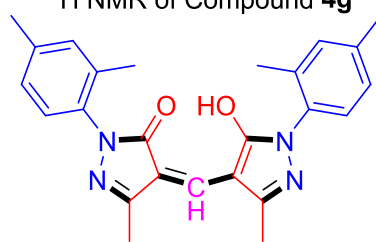

600 MHz, CDCl<sub>3</sub>

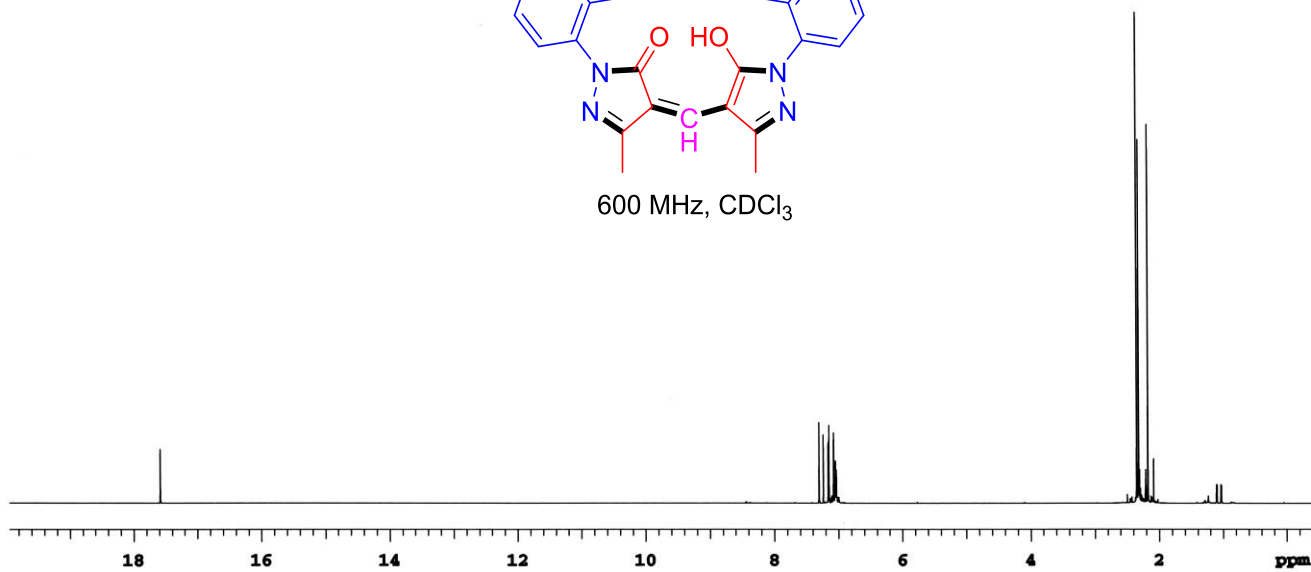

<sup>13</sup>C NMR of Compound **4g**

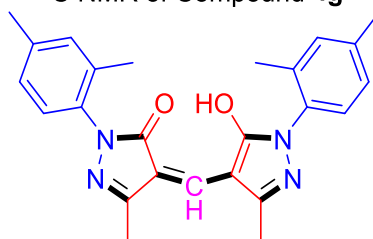

75 MHz, CDCl<sub>3</sub>

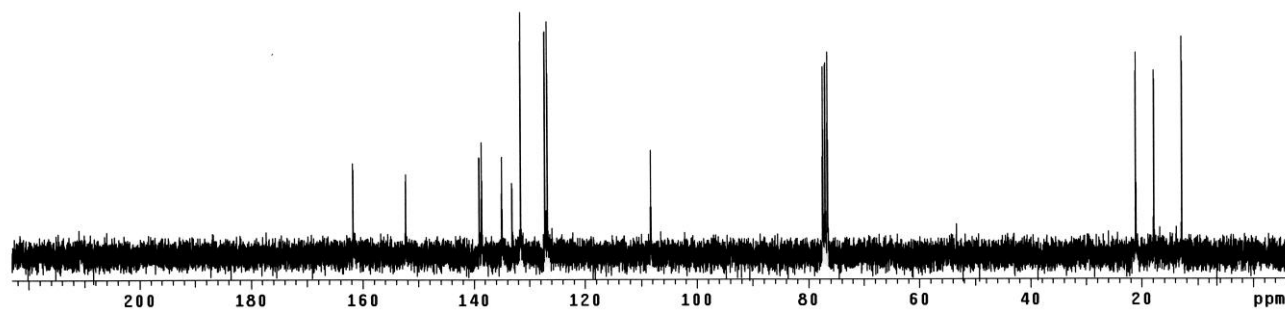

<sup>1</sup>H NMR of Compound **4h**

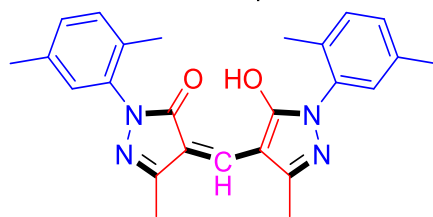

300 MHz, CDCl<sub>3</sub>

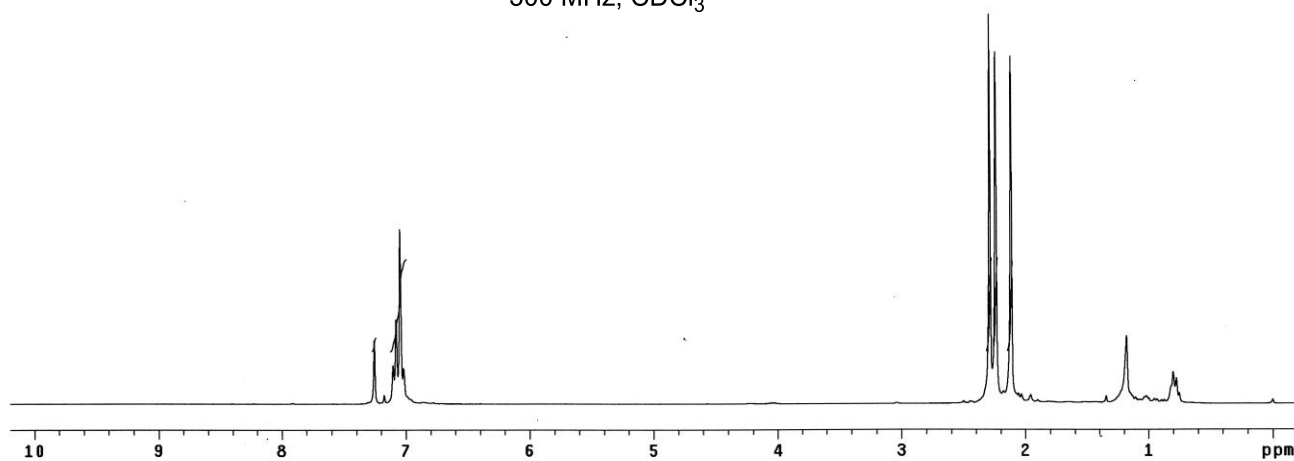

<sup>13</sup>C NMR of Compound **4h**

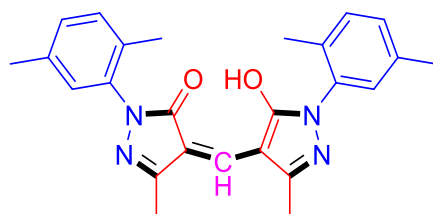

75 MHz, CDCl<sub>3</sub>

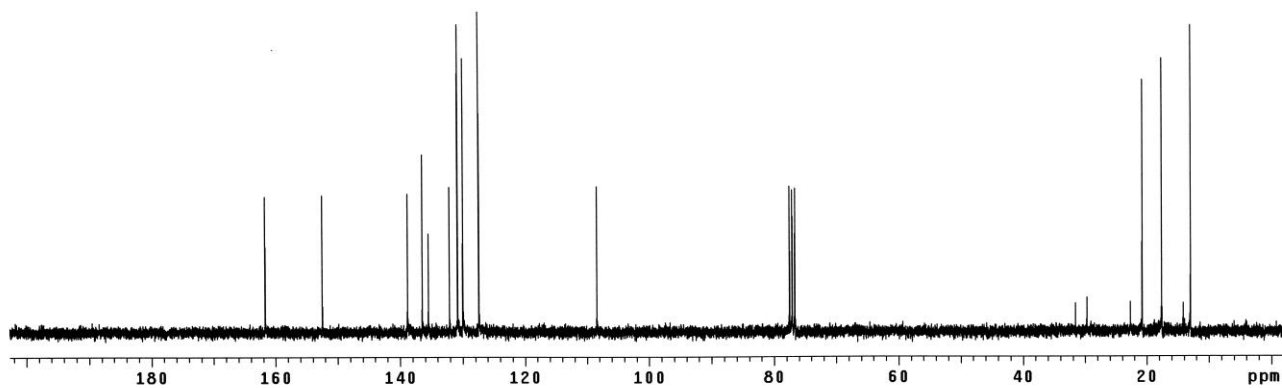

<sup>1</sup>H NMR of Compound 4i

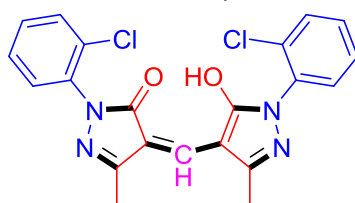

300 MHz, CDCl<sub>3</sub>

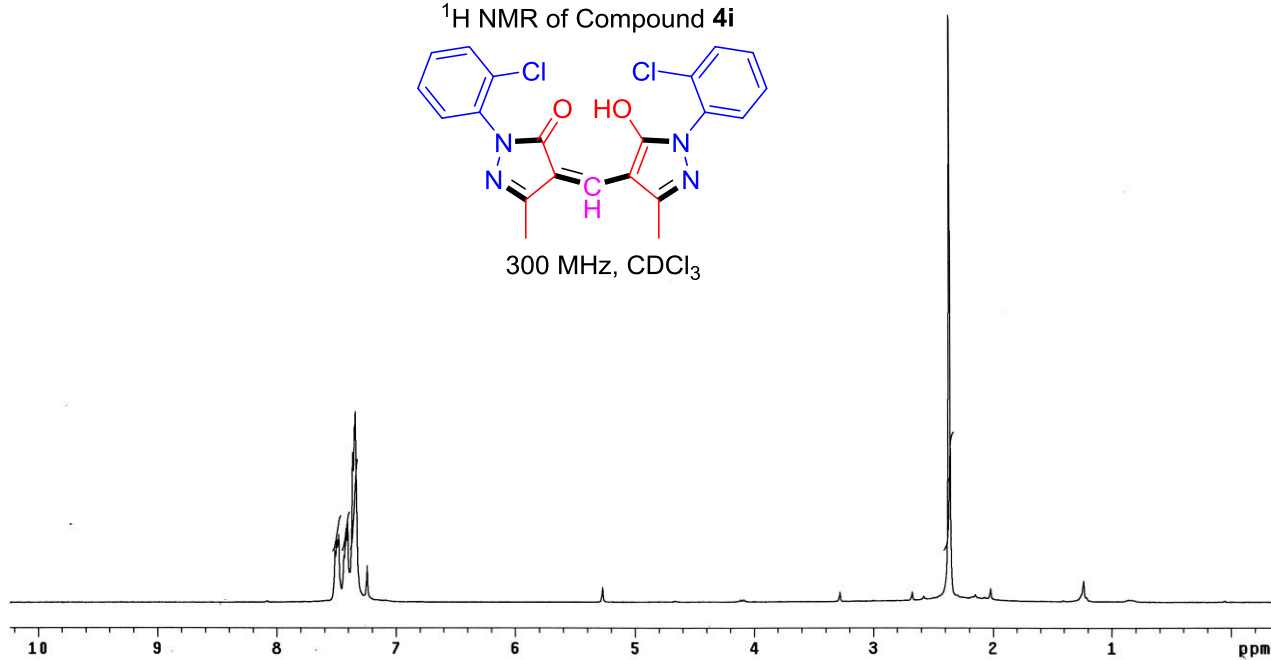

<sup>13</sup>C NMR of Compound 4i

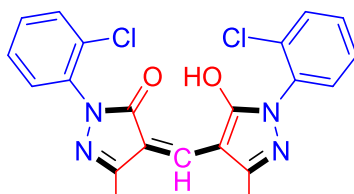

75 MHz, CDCl<sub>3</sub>

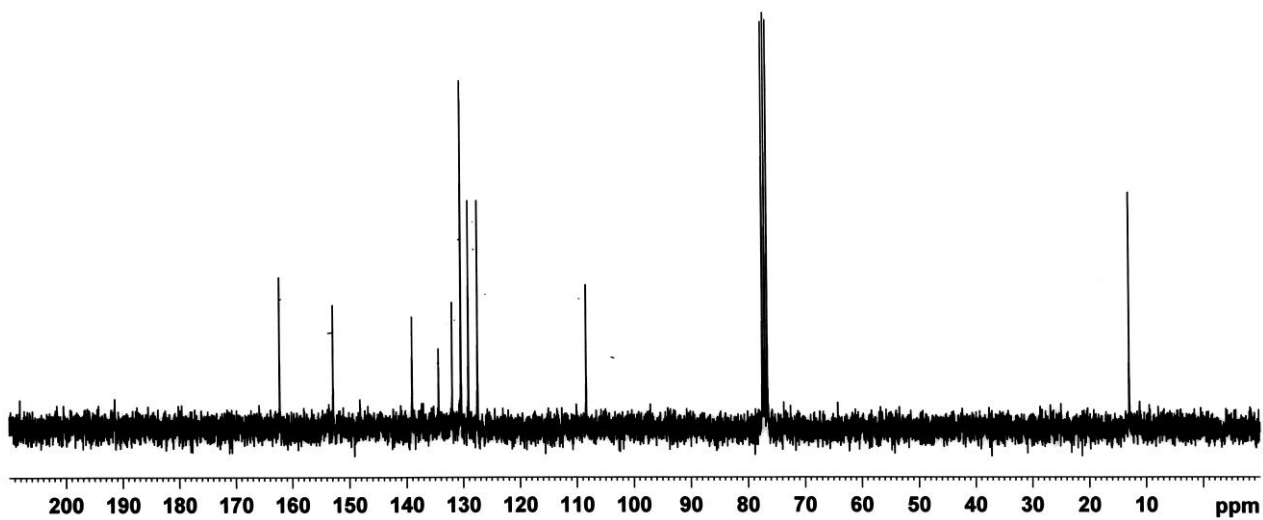

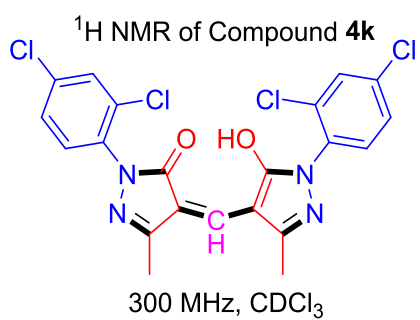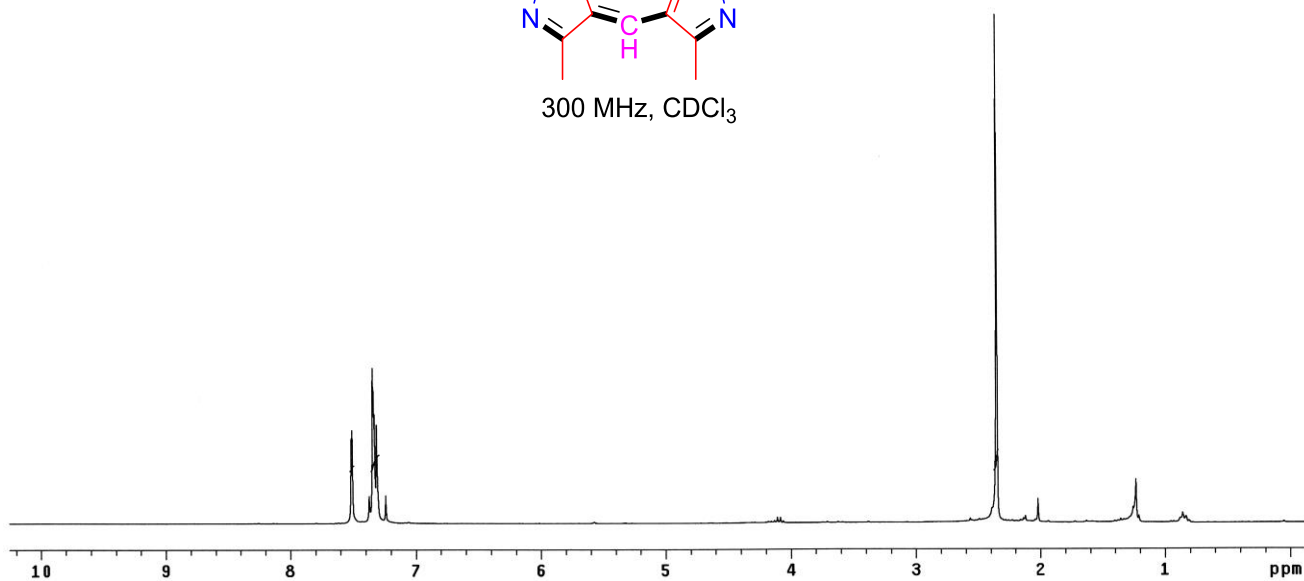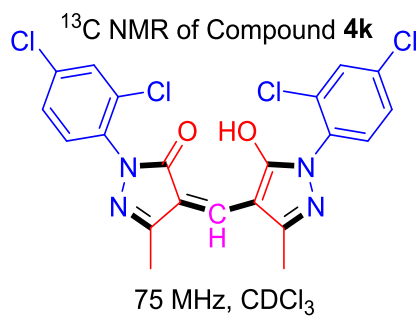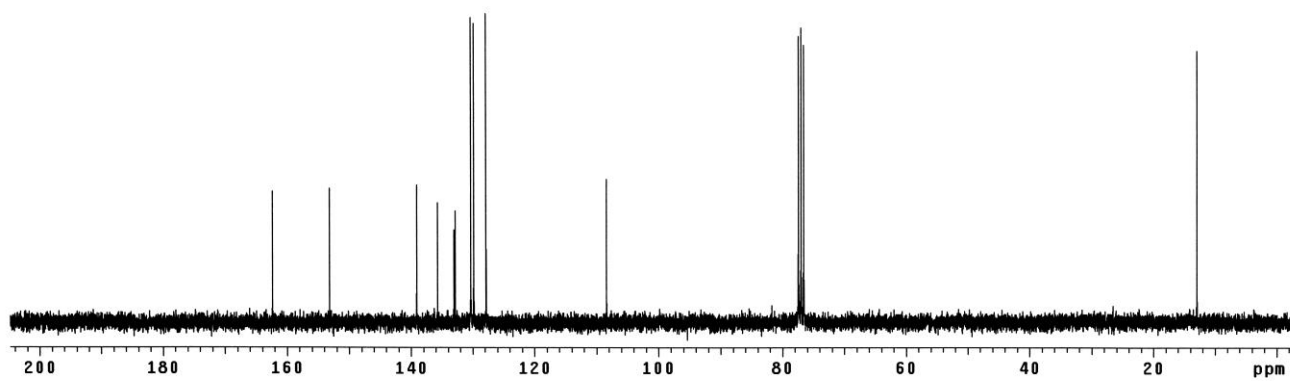

<sup>1</sup>H NMR of Compound **4I**

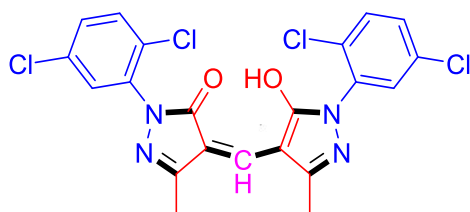

300 MHz, CDCl<sub>3</sub> + DMSO-d<sub>6</sub>

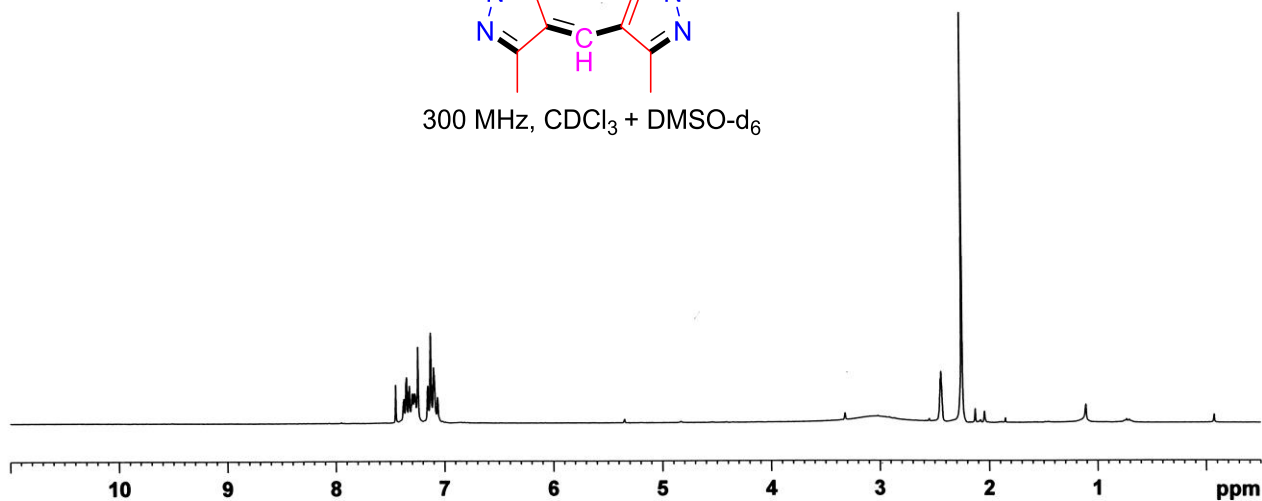

<sup>13</sup>C NMR of Compound **4I**

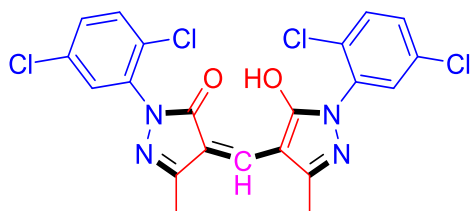

75 MHz, CDCl<sub>3</sub> + DMSO-d<sub>6</sub>

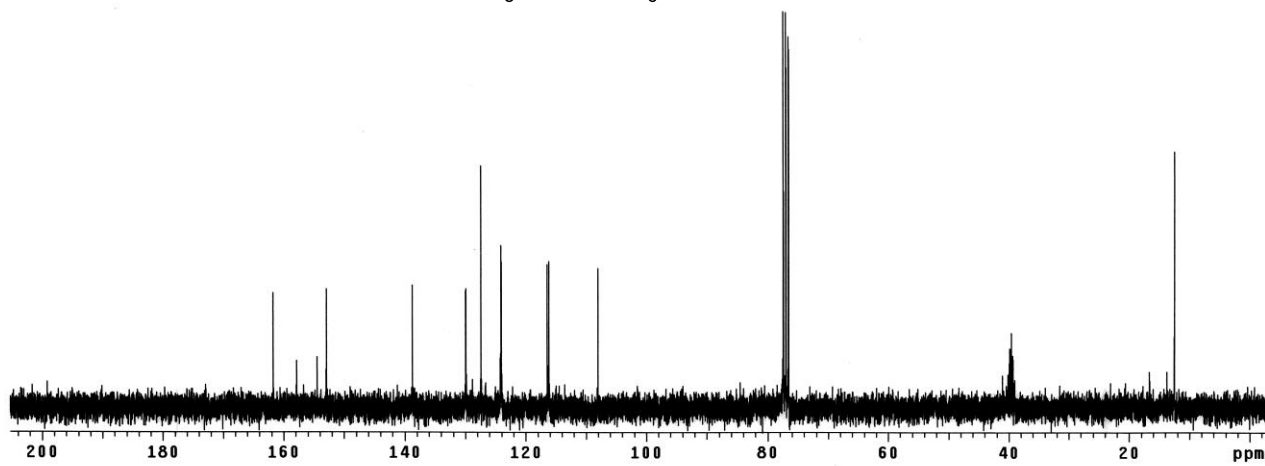

<sup>1</sup>H NMR of Compound 4m

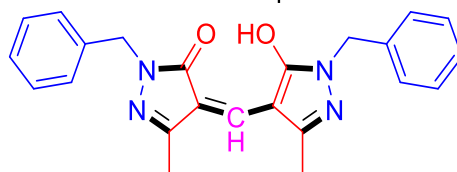

300 MHz, CDCl<sub>3</sub>

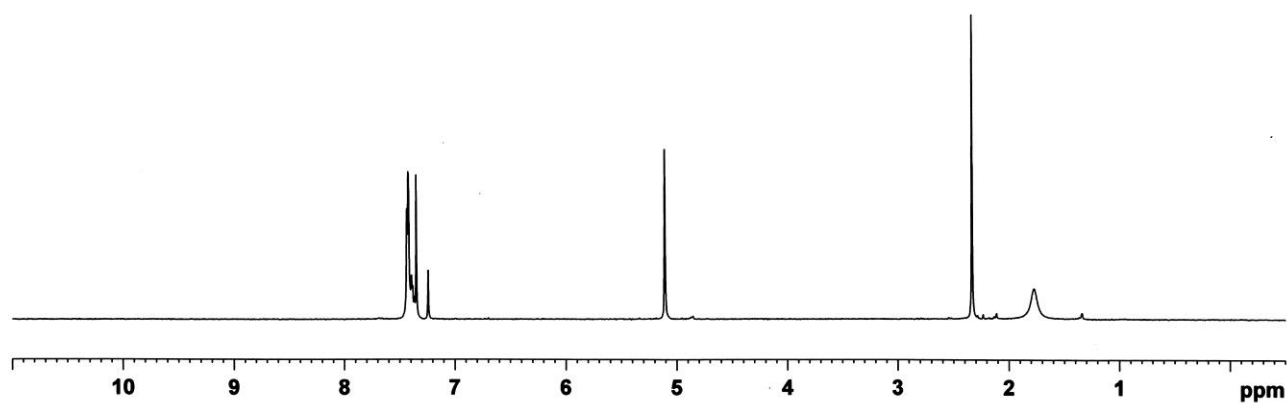

<sup>13</sup>C NMR of Compound 4m

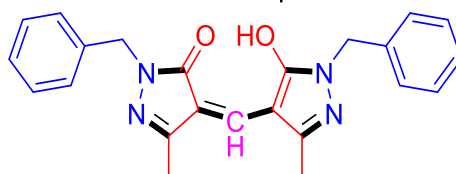

75 MHz, CDCl<sub>3</sub>

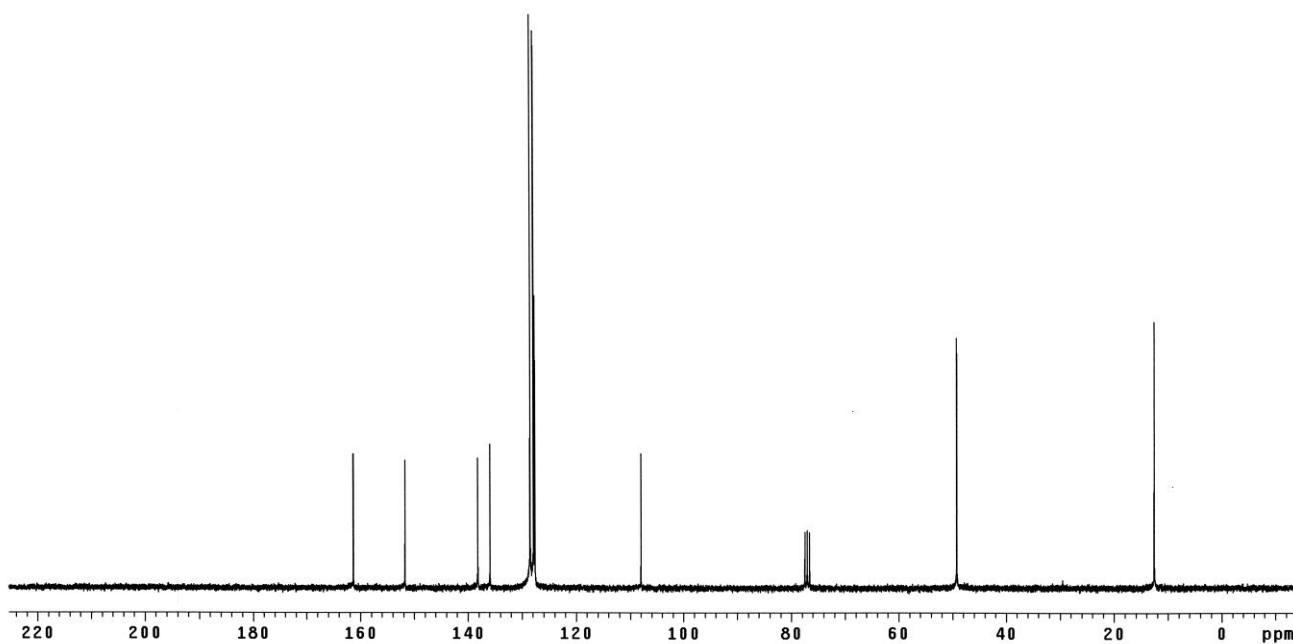

<sup>1</sup>H NMR of Compound **4n**

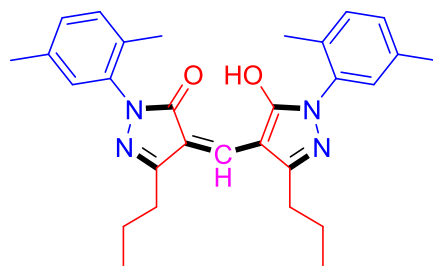

300 MHz, CDCl<sub>3</sub>

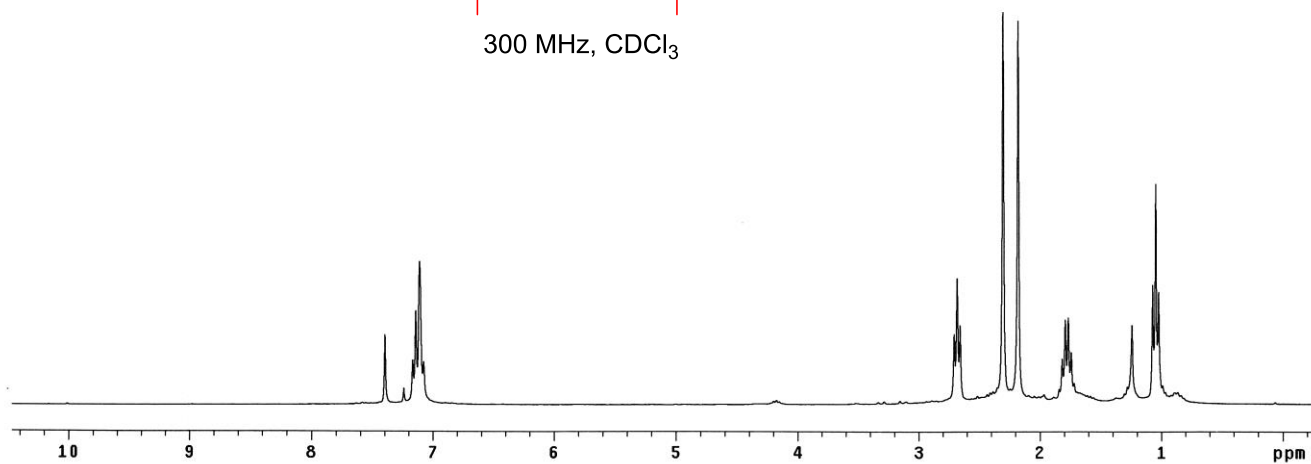

<sup>13</sup>C NMR of Compound **4n**

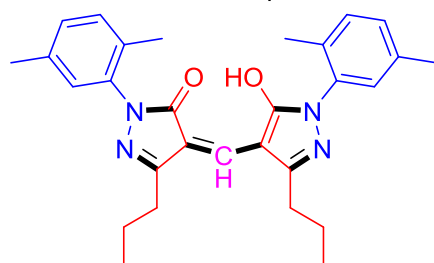

75 MHz, CDCl<sub>3</sub>

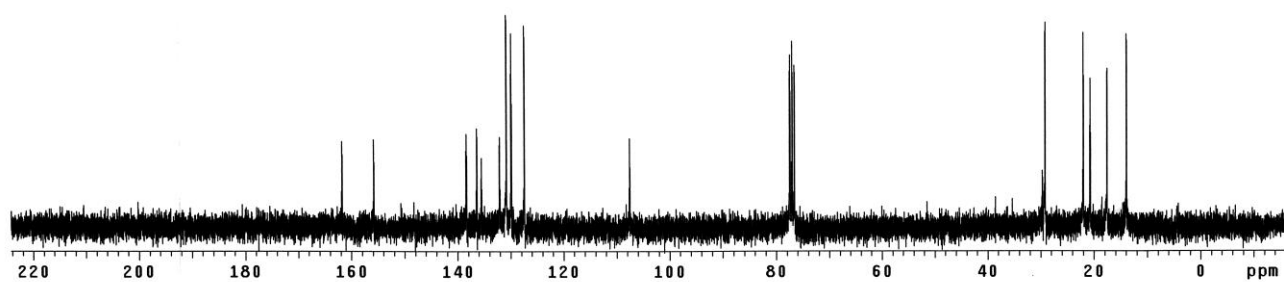

<sup>1</sup>H NMR of Compound **4o**

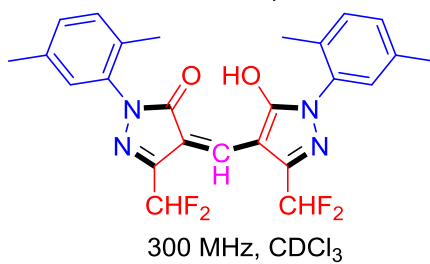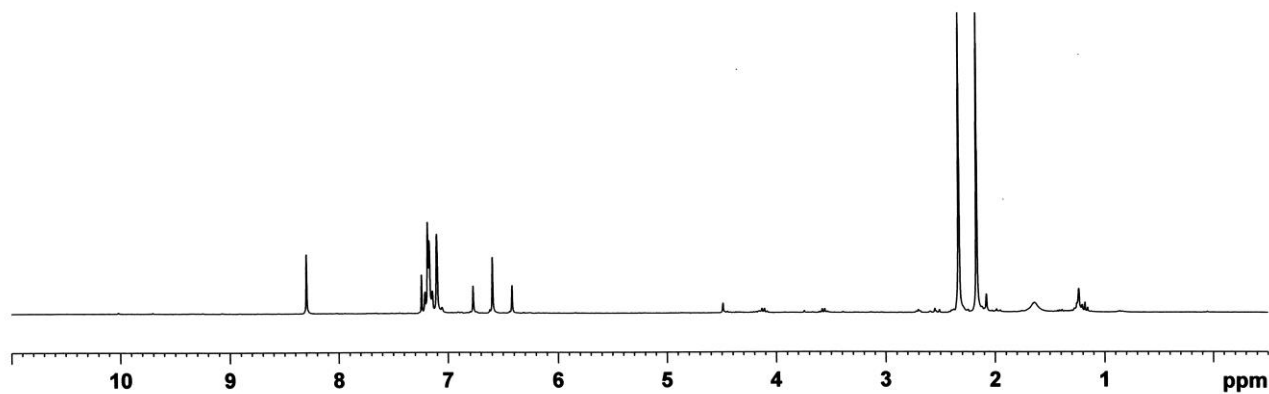

<sup>13</sup>C NMR of Compound **4o**

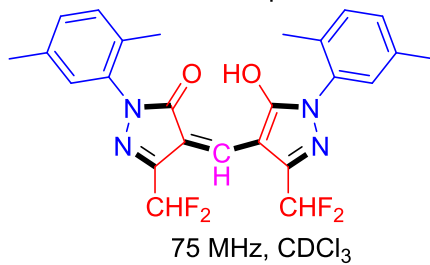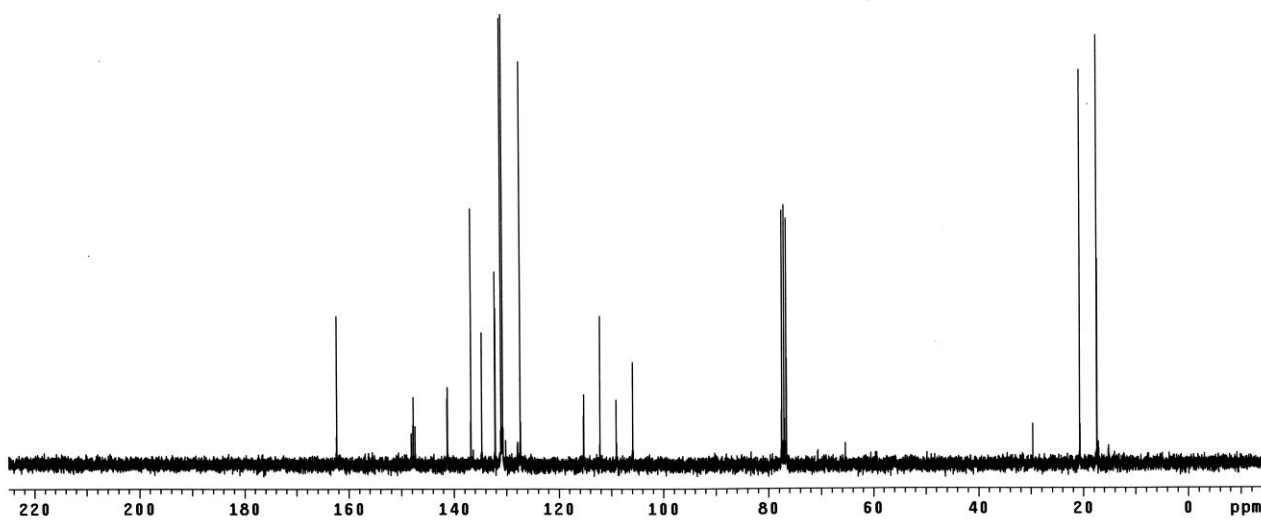



<sup>1</sup>H NMR of Compound 4p

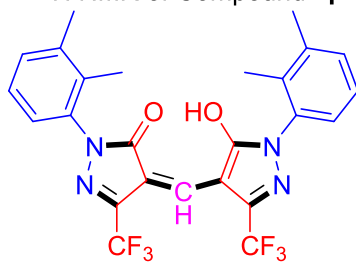

300 MHz, CDCl<sub>3</sub> + DMSO-d<sub>6</sub>

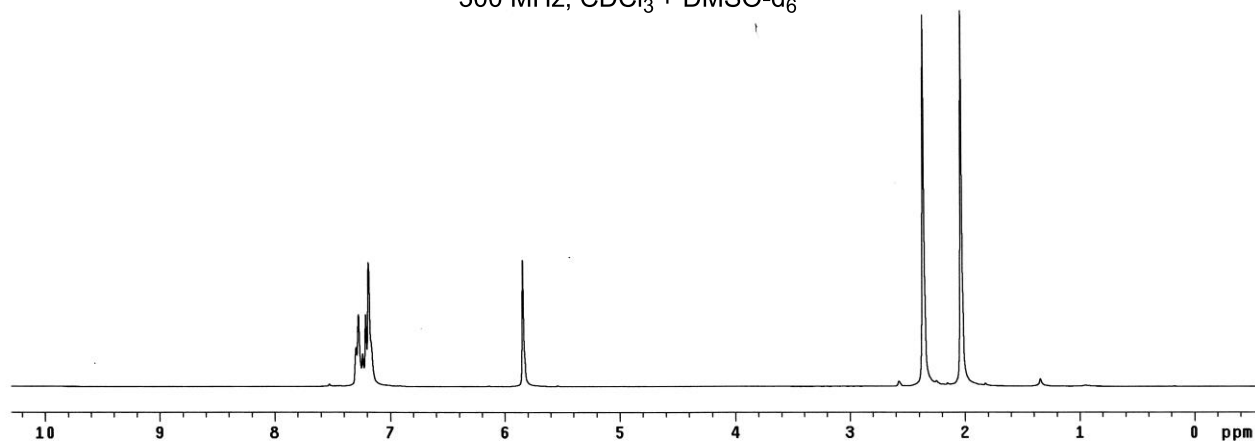

<sup>13</sup>C NMR of Compound 4p

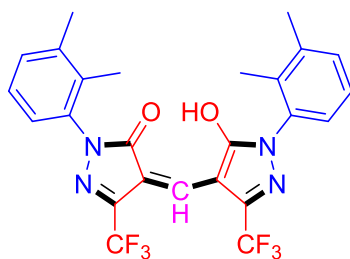

75 MHz, CDCl<sub>3</sub> + DMSO-d<sub>6</sub>

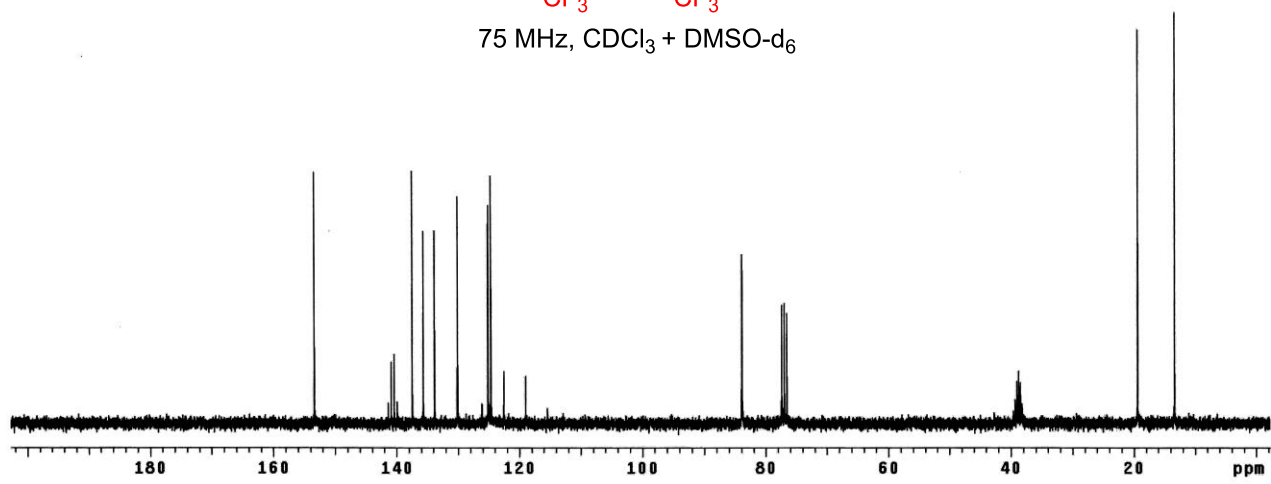

Supplement: c6ra10530k1.pdf [file c6ra10530k1.pdf]
